# Supplementary material for: The Impacts of Antivirals on the Coronavirus Genome Structure and Subsequent Pathogenicity, Virus Fitness and Antiviral Design
Source: MDPI journal article supplement (doi:10.3390/biomedicines8100376), 2020-09-24
Supplement: s1 [file s1]

# The impacts of antivirals on the coronavirus genome structure and subsequent pathogenicity, virus fitness and antiviral design

Ching-Hung Lin<sup>1</sup>, Cheng-Yao Yang<sup>1</sup>, Shan-Chia Ou<sup>2</sup>, Meilin Wang<sup>3</sup>, Chen-Yu Lo<sup>1</sup>, Tsung-Lin Tsai<sup>1</sup>, Hung-Yi Wu<sup>1\*</sup>

<sup>1</sup> Graduate Institute of Veterinary Pathobiology, College of Veterinary Medicine, National Chung Hsing University, Taichung 40227, Taiwan; [tw23whale@hotmail.com](mailto:tw23whale@hotmail.com) (C.-H.L.); [yangchengyao@nchu.edu.tw](mailto:yangchengyao@nchu.edu.tw) (C.-Y. Y); [axfbji7917@gmail.com](mailto:axfbji7917@gmail.com) (C.-Y.L.); [windtaker10@msn.com](mailto:windtaker10@msn.com) (T.-L.T.)

<sup>2</sup> Graduate Institute of Microbiology and Public Health, College of Veterinary Medicine, National Chung Hsing University, Taichung 40227, Taiwan; [scou@dragon.nchu.edu.tw](mailto:scou@dragon.nchu.edu.tw) (S.-C.O.)

<sup>3</sup> Department of Microbiology and Immunology, School of Medicine, Chung-Shan Medical University and Clinical Laboratory, Chung-Shan Medical University Hospital, Taichung 40201, Taiwan ; [wml@csmu.edu.tw](mailto:wml@csmu.edu.tw) (M. W.)

\* Correspondence; E-Mail: [hwy2@dragon.nchu.edu.tw](mailto:hwy2@dragon.nchu.edu.tw) (H.-Y.W.); Telephone: +886-4-22840369; Fax: +886-4-22862073

## Supplementary Figures

**A**

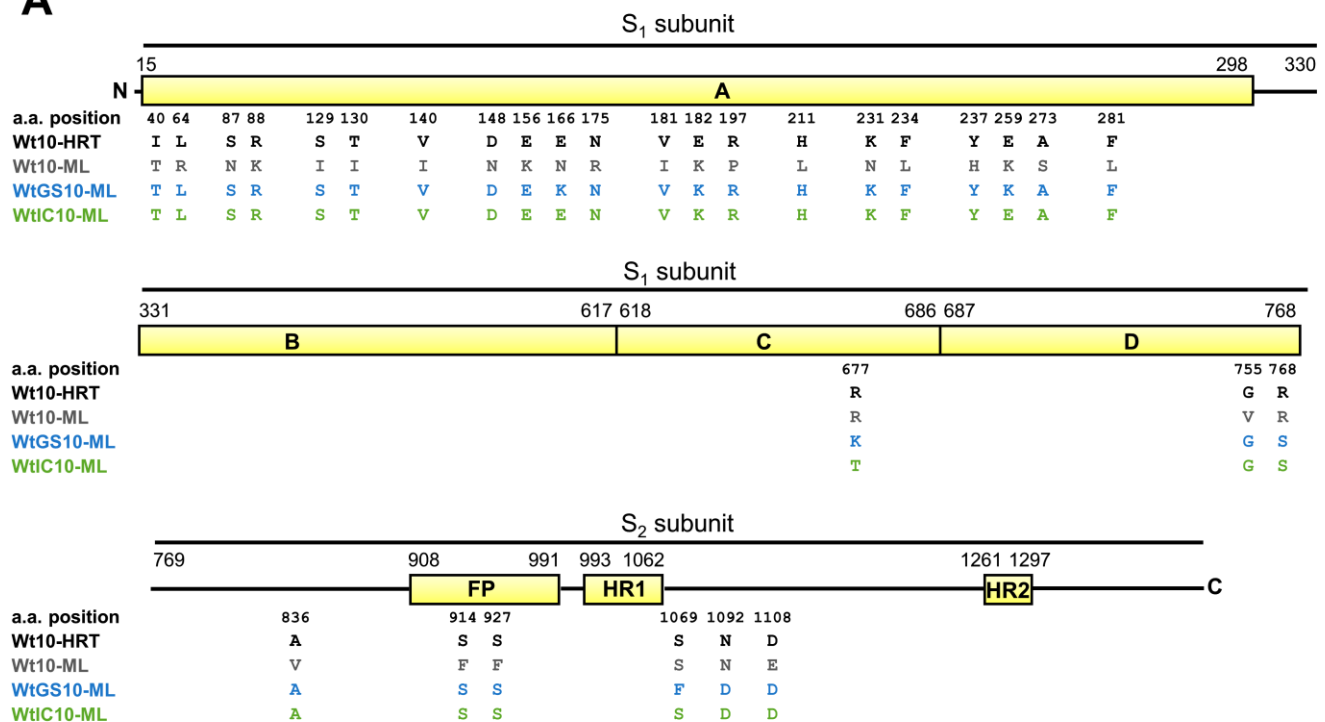

**B**

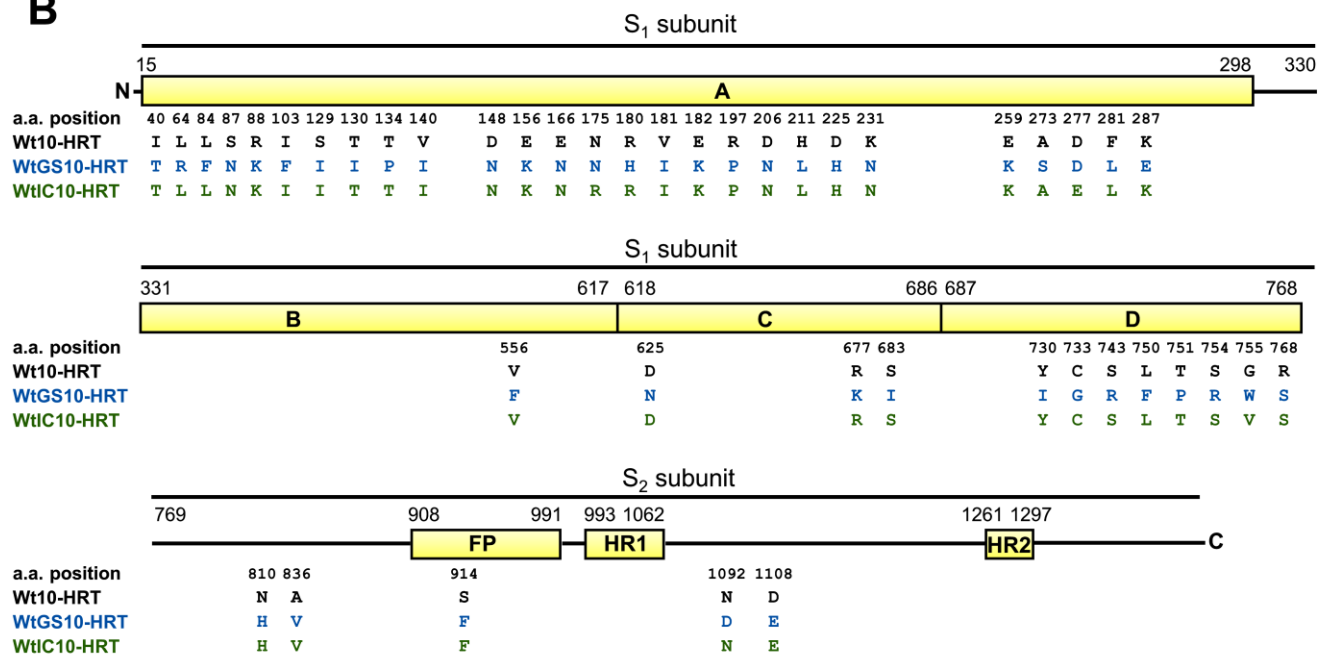

**Figure S1. Comparison of the S protein aa sequences identified from HRT-18 cells and ML cells infected with wt BCoV and its variants. (A)** Linear schematic of BCoV S protein showing the comparison of the aa sequences for Wt10-ML, WtGS10-ML and WtIC10-ML identified from ML cells infected with Wt10, WtGS10 and WtIC10, respectively, at VP10. **(B)** Linear schematic of BCoV S protein showing the comparison of the aa sequences identified from HRT-18 cells under the treatments of antiviral GS-5734 (WtGS10-HRT, i.e., WtGS10 in Figure 1) and poly IC-induced innate immunity (WtIC10-HRT, i.e., WtIC10 in Figure 4) at VP10. Wt10-HRT (i.e., Wt10 in Figures 1 and 4): Viral RNA collected from HRT-18 cells infected with wt BCoV at VP10.
